# Supplementary material for: HPRT Deficiency Coordinately Dysregulates Canonical Wnt and Presenilin-1 Signaling: A Neuro-Developmental Regulatory Role for a Housekeeping Gene?
Source: PLoS One. 2011 Jan 28;6(1):e16572. doi: 10.1371/journal.pone.0016572 (PMC3030599; doi:10.1371/journal.pone.0016572)
Supplement: Table S1 — The list of significantly changed 286 entities (>2-fold) (XLS) [file pone.0016572.s001.xls]

## Sheet: Sheet1
Supplementary Table S1. The list of significantly changed 286 entities (> 2-fold)
PROBE_ID	SYMBOL	DEFINITION	RefSeq ACCESSION	1st Conc.	1st KD	2nd Conc.	2nd KD	3rd Conc.	3rd KD	Fold change	Regulation in KD
ILMN_1653028	COL4A1	Homo sapiens collagen, type IV, alpha 1 (COL4A1), mRNA.	NM_001845.4	700.4	1815.4	759.4	1785.8	791.6	1960.7	2.47152	up
ILMN_1657435	MT1M	Homo sapiens metallothionein 1M (MT1M), mRNA.	NM_176870.2	186.2	414.2	194.1	438.8	173.2	447	2.35005	up
ILMN_1657962	LOC728946	PREDICTED: Homo sapiens similar to keratin associated protein 1-1 (LOC728946), mRNA.	XM_001128870.1	219.4	683.4	227.7	748.3	245.8	743.8	3.14057	up
ILMN_1658448	KRTAP2-1	PREDICTED: Homo sapiens keratin associated protein 2-1 (KRTAP2-1), mRNA.	XM_926554.2	52.2	102.8	52.5	106.5	53.3	115.9	2.05568	up
ILMN_1658660	ACTC1	Homo sapiens actin, alpha, cardiac muscle 1 (ACTC1), mRNA.	NM_005159.4	273.9	768.6	253.4	841.2	275.1	770.2	2.96555	up
ILMN_1658926	NOTCH3	Homo sapiens Notch homolog 3 (Drosophila) (NOTCH3), mRNA.	NM_000435.1	83.5	169.6	89.3	182.1	80.3	167.2	2.05072	up
ILMN_1659297	FZD6	Homo sapiens frizzled homolog 6 (Drosophila) (FZD6), mRNA.	NM_003506.2	783	1673.8	699.1	1740.6	765.1	1719.7	2.28707	up
ILMN_1660067	LOC728285	PREDICTED: Homo sapiens similar to keratin associated protein 2-4 (LOC728285), mRNA.	XM_001127070.1	101	292.8	101.4	281.2	94.6	286.5	2.89837	up
ILMN_1660718	GABBR2	Homo sapiens gamma-aminobutyric acid (GABA) B receptor, 2 (GABBR2), mRNA.	NM_005458.5	342.2	848.8	358.8	834	329.4	851.3	2.46074	up
ILMN_1664861	ID1	Homo sapiens inhibitor of DNA binding 1, dominant negative helix-loop-helix protein (ID1), transcript variant 2, mRNA.	NM_181353.1	774.5	1914.6	684.7	2042.6	708.8	1884.9	2.69671	up
ILMN_1665792	ITGA2	Homo sapiens integrin, alpha 2 (CD49B, alpha 2 subunit of VLA-2 receptor) (ITGA2), mRNA.	NM_002203.3	113.6	272.9	115	256.9	115.5	255.6	2.28152	up
ILMN_1669114	WNK4	Homo sapiens WNK lysine deficient protein kinase 4 (WNK4), mRNA.	NM_032387.3	49	213.6	43.2	207.1	47.3	216.9	4.57615	up
ILMN_1669119	LOC728946	PREDICTED: Homo sapiens similar to keratin associated protein 1-1 (LOC728946), mRNA.	XM_001128870.1	151.7	512.9	160.5	511	157	503	3.25502	up
ILMN_1669362	IGFBP6	Homo sapiens insulin-like growth factor binding protein 6 (IGFBP6), mRNA.	NM_002178.2	3099.7	6835.6	3287.1	6847.2	3312.7	6677.9	2.09993	up
ILMN_1669497	OSBPL10	Homo sapiens oxysterol binding protein-like 10 (OSBPL10), mRNA.	NM_017784.3	69.7	148.2	75.1	150.3	75.1	151.8	2.04891	up
ILMN_1669881	TSPAN13	Homo sapiens tetraspanin 13 (TSPAN13), mRNA.	NM_014399.3	581.3	1182.2	547.8	1115.2	514.3	1120.2	2.08145	up
ILMN_1675797	EPDR1	Homo sapiens ependymin related protein 1 (zebrafish) (EPDR1), mRNA.	NM_017549.3	3412.8	6658.2	3044.4	7007.2	3476.8	7024	2.0856	up
ILMN_1676336	AADACL1	Homo sapiens arylacetamide deacetylase-like 1 (AADACL1), mRNA.	NM_020792.3	329.9	919.6	404.6	955.5	398.2	934.5	2.49058	up
ILMN_1676602	SLC7A14	Homo sapiens solute carrier family 7 (cationic amino acid transporter, y+ system), member 14 (SLC7A14), mRNA.	NM_020949.1	235.4	505.4	242.4	527.3	256.2	467.1	2.04203	up
ILMN_1677292	C5orf30	Homo sapiens chromosome 5 open reading frame 30 (C5orf30), mRNA.	NM_033211.2	272	661.1	261.1	676.4	275.6	693.3	2.51138	up
ILMN_1680110	C10orf116	Homo sapiens chromosome 10 open reading frame 116 (C10orf116), mRNA.	NM_006829.2	1810.1	4820.5	1765	5119.2	1682.6	4955.9	2.83354	up
ILMN_1680507	PPP2R2C	Homo sapiens protein phosphatase 2 (formerly 2A), regulatory subunit B, gamma isoform (PPP2R2C), transcript variant 2, mRNA.	NM_181876.2	35.6	89	45.4	90.7	47.2	88.8	2.11019	up
ILMN_1680774	LOC730994	PREDICTED: Homo sapiens similar to NACHT, leucine rich repeat and PYD (pyrin domain) containing 1, transcript variant 1 (LOC730994), mRNA.	XM_001132373.1	219.2	416.5	226.4	492.5	213.9	418.7	2.00755	up
ILMN_1681558	LOC728956	PREDICTED: Homo sapiens similar to keratin associated protein 1.5 (LOC728956), mRNA.	XM_001128901.1	214.1	682.7	221.8	638.5	195.9	704.5	3.20789	up
ILMN_1682099	TNFAIP8L3	Homo sapiens tumor necrosis factor, alpha-induced protein 8-like 3 (TNFAIP8L3), mRNA.	NM_207381.2	175.2	329.9	150.2	352.9	184.6	380.1	2.08849	up
ILMN_1682599	GPRC5A	Homo sapiens G protein-coupled receptor, family C, group 5, member A (GPRC5A), mRNA.	NM_003979.3	60.6	146.6	51.8	149.6	51.2	123.9	2.56658	up
ILMN_1685397	ITGA3	Homo sapiens integrin, alpha 3 (antigen CD49C, alpha 3 subunit of VLA-3 receptor) (ITGA3), transcript variant a, mRNA.	NM_002204.1	734.9	1690.6	737.3	1669.1	696.6	1622.5	2.29765	up
ILMN_1687583	CAV1	Homo sapiens caveolin 1, caveolae protein, 22kDa (CAV1), mRNA.	NM_001753.3	2403.1	5050.2	2744.6	5655.5	2754.6	5283.6	2.02519	up
ILMN_1687751	BAALC	Homo sapiens brain and acute leukemia, cytoplasmic (BAALC), transcript variant 2, mRNA.	NM_001024372.1	326.4	720.6	328.4	698.5	338.8	756.2	2.18843	up
ILMN_1688480	CCND1	Homo sapiens cyclin D1 (CCND1), mRNA.	NM_053056.2	10383.7	19576.3	10371	22024.2	10518.5	21536.1	2.01631	up
ILMN_1689177	PPAPDC1A	Homo sapiens phosphatidic acid phosphatase type 2 domain containing 1A (PPAPDC1A), mRNA.	NM_001030059.1	81.3	200.3	95.6	192.6	81.7	215.4	2.35652	up
ILMN_1691071	FCRLA	Homo sapiens Fc receptor-like A (FCRLA), mRNA.	NM_032738.3	48.8	122.7	55.6	120.3	63.4	132.6	2.24918	up
ILMN_1694840	MATN2	Homo sapiens matrilin 2 (MATN2), transcript variant 1, mRNA.	NM_002380.3	430.6	1137.4	429.5	1139.7	381.1	1070.3	2.70009	up
ILMN_1695590	ADRB2	Homo sapiens adrenergic, beta-2-, receptor, surface (ADRB2), mRNA.	NM_000024.4	87	240.8	119.3	258.6	93.1	237.2	2.48178	up
ILMN_1696738	KRTAP9-4	Homo sapiens keratin associated protein 9-4 (KRTAP9-4), mRNA.	NM_033191.2	63.4	178.4	68	169.8	71.9	162.3	2.51251	up
ILMN_1698685	MATN2	Homo sapiens matrilin 2 (MATN2), transcript variant 1, mRNA.	NM_002380.3	85.4	194.9	104.7	186.7	81.4	170.3	2.04196	up
ILMN_1699071	C21orf7	Homo sapiens chromosome 21 open reading frame 7 (C21orf7), mRNA.	NM_020152.2	638.8	1421.2	704.9	1505.5	726.5	1442.5	2.11304	up
ILMN_1699980	TSPAN18	Homo sapiens tetraspanin 18 (TSPAN18), transcript variant 2, mRNA.	NM_130783.3	382.5	925.1	414.4	1011.2	369.2	960.8	2.4857	up
ILMN_1700888	ENPP1	Homo sapiens ectonucleotide pyrophosphatase/phosphodiesterase 1 (ENPP1), mRNA.	NM_006208.1	205.3	434.5	205.2	481.8	213.8	471.5	2.2212	up
ILMN_1703926	PTGER2	Homo sapiens prostaglandin E receptor 2 (subtype EP2), 53kDa (PTGER2), mRNA.	NM_000956.2	107.5	462	95.6	448.6	110.1	426.2	4.27386	up
ILMN_1705231	SLCO2A1	Homo sapiens solute carrier organic anion transporter family, member 2A1 (SLCO2A1), mRNA.	NM_005630.1	49.2	112.1	57.6	119.8	51.4	119.6	2.22577	up
ILMN_1705250	ADAMTSL1	Homo sapiens ADAMTS-like 1 (ADAMTSL1), transcript variant 2, mRNA.	NM_052866.3	191.9	414.9	182.7	455.5	185.4	459.5	2.37282	up
ILMN_1707652	KRTAP1-5	Homo sapiens keratin associated protein 1-5 (KRTAP1-5), mRNA.	NM_031957.1	390.7	1288.8	368.8	1359.6	424.3	1320.9	3.35779	up
ILMN_1709795	RAC2	Homo sapiens ras-related C3 botulinum toxin substrate 2 (rho family, small GTP binding protein Rac2) (RAC2), mRNA.	NM_002872.3	348.8	997.9	360.8	1043.7	390.8	1025.2	2.7897	up
ILMN_1711311	PODXL	Homo sapiens podocalyxin-like (PODXL), transcript variant 1, mRNA.	NM_001018111.2	67.4	193	76.4	198.7	68.7	218.3	2.871	up
ILMN_1711617	GMFG	Homo sapiens glia maturation factor, gamma (GMFG), mRNA.	NM_004877.1	86	184.8	82.9	187.2	94.7	177.9	2.08895	up
ILMN_1711628	LOC728951	PREDICTED: Homo sapiens similar to keratin associated protein 1-3 (LOC728951), mRNA.	XM_001128885.1	149.7	417.8	132.5	421.9	147.7	388.9	2.86022	up
ILMN_1715175	MET	Homo sapiens met proto-oncogene (hepatocyte growth factor receptor) (MET), mRNA.	NM_000245.2	190.3	433.6	207.8	451.4	198.1	542.4	2.38415	up
ILMN_1716264	ANKRD1	Homo sapiens ankyrin repeat domain 1 (cardiac muscle) (ANKRD1), mRNA.	NM_014391.2	151	632	160.3	634.5	157.5	677.1	4.14512	up
ILMN_1716822	KRTAP9-8	Homo sapiens keratin associated protein 9-8 (KRTAP9-8), mRNA.	NM_031963.2	66.9	152.7	63.1	149.6	68.4	143	2.24491	up
ILMN_1720998	CA12	Homo sapiens carbonic anhydrase XII (CA12), transcript variant 1, mRNA.	NM_001218.3	387.3	800.4	344.5	755.5	375.4	750.3	2.08456	up
ILMN_1723358	SCARA3	Homo sapiens scavenger receptor class A, member 3 (SCARA3), transcript variant 1, mRNA.	NM_016240.2	230.6	465.6	239.8	519.9	236.2	497.7	2.09719	up
ILMN_1726666	GPX3	Homo sapiens glutathione peroxidase 3 (plasma) (GPX3), mRNA.	NM_002084.3	212	449.2	228.9	448.3	198.6	429.1	2.07747	up
ILMN_1727084	ADAMTSL1	Homo sapiens ADAMTS-like 1 (ADAMTSL1), transcript variant 4, mRNA.	NM_001040272.4	74.8	194.2	76.2	210.7	97.7	192.4	2.418	up
ILMN_1730229	CGNL1	Homo sapiens cingulin-like 1 (CGNL1), mRNA.	NM_032866.3	164.3	346.3	136.8	364.3	148.1	368.4	2.40797	up
ILMN_1730454	FOLR3	Homo sapiens folate receptor 3 (gamma) (FOLR3), mRNA.	NM_000804.2	231.8	552.9	237.3	550.4	257.7	543.7	2.2684	up
ILMN_1730777	KRT19	Homo sapiens keratin 19 (KRT19), mRNA.	NM_002276.3	55.5	562.3	71.3	593.6	56.3	533.8	9.28218	up
ILMN_1733415	MFAP5	Homo sapiens microfibrillar associated protein 5 (MFAP5), mRNA.	NM_003480.2	852.8	1870.5	786.6	1702.6	753.9	1852.8	2.2681	up
ILMN_1738147	NES	Homo sapiens nestin (NES), mRNA.	NM_006617.1	92.1	202.3	103.1	204.6	112.6	213.7	2.02248	up
ILMN_1738558	RGS20	Homo sapiens regulator of G-protein signaling 20 (RGS20), transcript variant 1, mRNA.	NM_170587.1	108.9	425.9	118.8	421.5	111.8	410.4	3.70688	up
ILMN_1746888	PCOLCE2	Homo sapiens procollagen C-endopeptidase enhancer 2 (PCOLCE2), mRNA.	NM_013363.2	102.1	574.9	109.3	599.6	93.7	567	5.71764	up
ILMN_1747067	NPAS1	Homo sapiens neuronal PAS domain protein 1 (NPAS1), mRNA.	NM_002517.2	69.6	192	64.2	194.3	66.5	188.9	2.87307	up
ILMN_1749071	CNIH3	Homo sapiens cornichon homolog 3 (Drosophila) (CNIH3), mRNA.	NM_152495.1	153.4	307.2	164.8	325.4	134.4	330.6	2.13462	up
ILMN_1751328	FAM83H	Homo sapiens family with sequence similarity 83, member H (FAM83H), mRNA.	NM_198488.2	102.8	221.8	122.8	246.7	101.5	221.1	2.11359	up
ILMN_1756685	DEPDC6	Homo sapiens DEP domain containing 6 (DEPDC6), mRNA.	NM_022783.1	70.4	198.7	76.4	189.5	77.4	205.7	2.64979	up
ILMN_1758067	RGS4	Homo sapiens regulator of G-protein signalling 4 (RGS4), mRNA.	NM_005613.3	147	495.4	152.7	487.5	152	509.7	3.30432	up
ILMN_1758128	CYGB	Homo sapiens cytoglobin (CYGB), mRNA.	NM_134268.3	198.3	510.1	243.6	568.8	192.4	548.8	2.57795	up
ILMN_1761281	LOC441019	PREDICTED: Homo sapiens hypothetical LOC441019 (LOC441019), mRNA.	XM_498969.2	319.8	628.8	305.9	636.8	303.2	641.2	2.05324	up
ILMN_1769891	CDH4	Homo sapiens cadherin 4, type 1, R-cadherin (retinal) (CDH4), mRNA.	NM_001794.2	70.5	206.7	78.8	194.3	75.4	196.6	2.66136	up
ILMN_1770338	TM4SF1	Homo sapiens transmembrane 4 L six family member 1 (TM4SF1), mRNA.	NM_014220.2	73.7	201.7	74.4	193.2	78.9	169.8	2.48224	up
ILMN_1771652	BAIAP2L2	Homo sapiens BAI1-associated protein 2-like 2 (BAIAP2L2), mRNA.	NM_025045.4	256.3	636.5	247.7	625	235.1	593.4	2.51015	up
ILMN_1782015	FCRLB	Homo sapiens Fc receptor-like B (FCRLB), mRNA.	NM_001002901.2	143.1	428.9	134.9	450.6	145.2	466	3.17911	up
ILMN_1782057	ATP8B2	Homo sapiens ATPase, class I, type 8B, member 2 (ATP8B2), transcript variant 1, mRNA.	NM_020452.2	508.9	1260.2	465.1	1194.2	479.5	1072	2.42241	up
ILMN_1784948	SPOCD1	Homo sapiens SPOC domain containing 1 (SPOCD1), mRNA.	NM_144569.4	406.5	895.2	411.7	889.4	397.4	894.8	2.2044	up
ILMN_1788538	NCALD	Homo sapiens neurocalcin delta (NCALD), mRNA.	NM_032041.1	153.4	360.1	140.4	344.2	149.4	352.7	2.38616	up
ILMN_1789502	GPC4	Homo sapiens glypican 4 (GPC4), mRNA.	NM_001448.2	146.2	384.8	166.1	384.9	196.4	391.8	2.30001	up
ILMN_1791726	TUBB3	Homo sapiens tubulin, beta 3 (TUBB3), mRNA.	NM_006086.2	1670.4	3645.1	1677.1	3653.3	1787.8	3969.1	2.19346	up
ILMN_1794803	NDP	Homo sapiens Norrie disease (pseudoglioma) (NDP), mRNA.	NM_000266.1	96.2	234.8	84	237.2	81.5	218	2.64171	up
ILMN_1794829	C6orf117	Homo sapiens chromosome 6 open reading frame 117 (C6orf117), mRNA.	NM_138409.1	73	189	66.1	166.6	68	190.2	2.63292	up
ILMN_1794875	AGPAT9	Homo sapiens 1-acylglycerol-3-phosphate O-acyltransferase 9 (AGPAT9), mRNA.	NM_032717.3	59.1	118.2	54	125	54.2	123.6	2.19376	up
ILMN_1795342	MLPH	Homo sapiens melanophilin (MLPH), transcript variant 2, mRNA.	NM_001042467.1	807.6	1922.5	768.2	1900.1	777.6	1749.7	2.36625	up
ILMN_1797822	KIAA0746	Homo sapiens KIAA0746 protein (KIAA0746), mRNA.	NM_015187.3	146.5	336	162.2	356.1	157.1	325	2.18395	up
ILMN_1801068	DACT1	Homo sapiens dapper, antagonist of beta-catenin, homolog 1 (Xenopus laevis) (DACT1), mRNA.	NM_016651.4	199.5	416	195.7	416.7	202.7	413	2.08366	up
ILMN_1801710	APBB1IP	Homo sapiens amyloid beta (A4) precursor protein-binding, family B, member 1 interacting protein (APBB1IP), mRNA.	NM_019043.3	136.4	274	134.3	292.3	138.2	296	2.10778	up
ILMN_1803367	EVI1	Homo sapiens ecotropic viral integration site 1 (EVI1), mRNA.	NM_005241.1	61.9	187.8	72.2	196.8	62.9	184.3	2.89372	up
ILMN_1804929	OXTR	Homo sapiens oxytocin receptor (OXTR), mRNA.	NM_000916.3	359.2	804.7	328.5	828.1	352.8	782.1	2.32199	up
ILMN_1805410	C15orf48	Homo sapiens chromosome 15 open reading frame 48 (C15orf48), transcript variant 2, mRNA.	NM_032413.2	128.1	328.9	137.6	307.2	117.5	336.2	2.54073	up
ILMN_1810172	SFRP4	Homo sapiens secreted frizzled-related protein 4 (SFRP4), mRNA.	NM_003014.2	54	153.9	59.6	149.9	54.4	167.2	2.80336	up
ILMN_1810628	KIAA0367	Homo sapiens KIAA0367 (KIAA0367), mRNA.	NM_015225.1	1135.9	2411.1	1136.8	2196.6	1137.9	2501.2	2.08127	up
ILMN_1825249		in27e08.x1 Human Fetal Pancreas 1B Homo sapiens cDNA clone IMAGE: 3, mRNA sequence	BU078529	115.6	293.8	128	312.3	117.4	273.4	2.43517	up
ILMN_1838863		Homo sapiens cDNA FLJ41846 fis, clone NT2RI3003162	AK123840	146.6	346.4	151	358.8	159	334.5	2.2774	up
ILMN_1876266	GJA3	Homo sapiens gap junction protein, alpha 3, 46kDa (GJA3), mRNA.	NM_021954.3	62.3	159.7	68.7	150.9	59.4	148.4	2.41397	up
ILMN_2049766	NFE2L3	Homo sapiens nuclear factor (erythroid-derived 2)-like 3 (NFE2L3), mRNA.	NM_004289.5	49.1	104.4	48.4	109.2	44.5	105.2	2.24673	up
ILMN_2060086	ADAM23	Homo sapiens ADAM metallopeptidase domain 23 (ADAM23), mRNA.	NM_003812.2	149.8	356	144.8	341.8	168.3	346.4	2.26019	up
ILMN_2060413	CD24	Homo sapiens CD24 molecule (CD24), mRNA.	NM_013230.2	38.6	157.9	50.3	149.3	38.1	162.9	3.73045	up
ILMN_2061446	AADACL1	Homo sapiens arylacetamide deacetylase-like 1 (AADACL1), mRNA.	NM_020792.3	536.6	1208.3	507.6	1178.1	499.1	1202.4	2.32639	up
ILMN_2068104	TFPI2	Homo sapiens tissue factor pathway inhibitor 2 (TFPI2), mRNA.	NM_006528.2	73.1	237.2	81.9	227.8	80.5	241.9	3.00448	up
ILMN_2073758	MMP12	Homo sapiens matrix metallopeptidase 12 (macrophage elastase) (MMP12), mRNA.	NM_002426.2	115.6	263.6	124.1	291.7	136.5	293	2.25751	up
ILMN_2083946	TGFA	Homo sapiens transforming growth factor, alpha (TGFA), mRNA.	NM_003236.1	48.6	100	51	101.7	49.5	115.9	2.12584	up
ILMN_2111932	SERINC2	Homo sapiens serine incorporator 2 (SERINC2), mRNA.	NM_178865.3	368.1	911.6	360.4	873.8	359.5	859.7	2.43055	up
ILMN_2130525	TSPAN13	Homo sapiens tetraspanin 13 (TSPAN13), mRNA.	NM_014399.3	689	1404.7	692.5	1371.5	707.8	1503.5	2.04697	up
ILMN_2170209	RASD2	Homo sapiens RASD family, member 2 (RASD2), mRNA.	NM_014310.3	58	131	62.8	138.3	52.4	147.2	2.40858	up
ILMN_2172755	DEPDC6	Homo sapiens DEP domain containing 6 (DEPDC6), mRNA.	NM_022783.1	67.8	210	74.2	189.1	74.8	172.4	2.63009	up
ILMN_2209260	KRTAP1-3	Homo sapiens keratin associated protein 1-3 (KRTAP1-3), mRNA.	NM_030966.1	91.5	212.5	99.5	264	102	239.5	2.43673	up
ILMN_2311537	HMGA1	Homo sapiens high mobility group AT-hook 1 (HMGA1), transcript variant 1, mRNA.	NM_145899.1	966.1	2196.4	1003.1	2377.4	983.4	2257.3	2.31261	up
ILMN_2328094	DACT1	Homo sapiens dapper, antagonist of beta-catenin, homolog 1 (Xenopus laevis) (DACT1), transcript variant 1, mRNA.	NM_016651.5	174.3	417.5	177	375.2	178.2	380.5	2.21326	up
ILMN_2336094	ODZ3	Homo sapiens odz, odd Oz/ten-m homolog 3 (Drosophila) (ODZ3), mRNA.	NM_001080477.1	150.1	522.1	135.9	512.8	144.1	568.3	3.72682	up
ILMN_2343097	NCALD	Homo sapiens neurocalcin delta (NCALD), transcript variant 3, mRNA.	NM_001040626.1	103.7	230.6	101.4	232.1	94.9	230.4	2.31195	up
ILMN_2352097	GPR56	Homo sapiens G protein-coupled receptor 56 (GPR56), transcript variant 2, mRNA.	NM_201524.1	76.7	235.3	74.4	209.3	71.9	200	2.88475	up
ILMN_2359287	ITGA6	Homo sapiens integrin, alpha 6 (ITGA6), transcript variant 2, mRNA.	NM_000210.2	100.4	263.6	105.3	246.4	87.5	216.8	2.47833	up
ILMN_2382942	CA12	Homo sapiens carbonic anhydrase XII (CA12), transcript variant 1, mRNA.	NM_001218.3	98	182.5	98.3	208.7	97.5	199.4	2.00713	up
ILMN_2383349	STEAP3	Homo sapiens STEAP family member 3 (STEAP3), transcript variant 2, mRNA.	NM_018234.2	534.8	1131.4	539	1125	559.3	1099.6	2.05523	up
ILMN_2384122	GPR56	Homo sapiens G protein-coupled receptor 56 (GPR56), transcript variant 3, mRNA.	NM_201525.1	65.4	198.8	57.8	202	68	192.4	3.10923	up
ILMN_2399100	FGF5	Homo sapiens fibroblast growth factor 5 (FGF5), transcript variant 2, mRNA.	NM_033143.2	161.2	307.3	155.8	327.9	158.6	317.7	2.00307	up
ILMN_2401344	PPP2R2C	Homo sapiens protein phosphatase 2 (formerly 2A), regulatory subunit B, gamma isoform (PPP2R2C), transcript variant 2, mRNA.	NM_181876.2	43.4	121	46.8	111.8	47.3	123.2	2.58869	up
ILMN_2413158	PODXL	Homo sapiens podocalyxin-like (PODXL), transcript variant 1, mRNA.	NM_001018111.1	210.9	1023.8	240.1	1015	227.5	1004.2	4.49107	up
ILMN_2413323	GRP	Homo sapiens gastrin-releasing peptide (GRP), transcript variant 3, mRNA.	NM_001012513.1	40.6	86	41.8	97	48	85.4	2.06029	up
ILMN_1651610	LOC730525	PREDICTED: Homo sapiens hypothetical protein LOC730525 (LOC730525), mRNA.	XM_001126202.1	422.8	109.1	413.1	103.3	408.3	104.9	3.92184	down
ILMN_1652371	KIAA1324L	Homo sapiens KIAA1324-like (KIAA1324L), mRNA.	NM_152748.2	1363.8	585.3	1330.4	560.5	1442.3	632.4	2.32781	down
ILMN_1656111	MYLIP	Homo sapiens myosin regulatory light chain interacting protein (MYLIP), mRNA.	NM_013262.3	1201.6	553.8	1226.3	566.5	1335.1	581.6	2.20918	down
ILMN_1656410	TRPC6	Homo sapiens transient receptor potential cation channel, subfamily C, member 6 (TRPC6), mRNA.	NM_004621.4	569.2	137.9	593.3	140.1	609.6	153.7	4.10805	down
ILMN_1656951	APCDD1	Homo sapiens adenomatosis polyposis coli down-regulated 1 (APCDD1), mRNA.	NM_153000.3	1626.7	525	1745.1	582.6	1647.1	555.8	3.01856	down
ILMN_1657803	CFH	Homo sapiens complement factor H (CFH), transcript variant 2, mRNA.	NM_001014975.1	399.2	183.1	409	177.4	433.9	176.9	2.31017	down
ILMN_1658494	C13orf15	Homo sapiens chromosome 13 open reading frame 15 (C13orf15), mRNA.	NM_014059.2	3719.2	1742	3540.4	1832.8	3724.7	1861.7	2.02072	down
ILMN_1660306	ITGA8	Homo sapiens integrin, alpha 8 (ITGA8), mRNA.	NM_003638.1	355.1	137.4	329.5	149.8	348.4	134.1	2.4535	down
ILMN_1660923	HCG4	Homo sapiens HLA complex group 4 (HCG4), non-coding RNA.	NR_002139.1	742	333.1	790.4	356.4	692.5	315.9	2.21243	down
ILMN_1663142	CLEC12A	Homo sapiens C-type lectin domain family 12, member A (CLEC12A), transcript variant 2, mRNA.	NM_201623.2	294.1	134.2	300.2	125.9	249.9	140.2	2.10401	down
ILMN_1664362	SGIP1	Homo sapiens SH3-domain GRB2-like (endophilin) interacting protein 1 (SGIP1), mRNA.	NM_032291.2	811.4	336.6	743.3	350.3	786.2	354.4	2.24713	down
ILMN_1666222	PHACTR3	Homo sapiens phosphatase and actin regulator 3 (PHACTR3), transcript variant 3, mRNA.	NM_183246.1	737.9	226	791.8	250.9	748.1	206	3.34476	down
ILMN_1669523	FOS	Homo sapiens v-fos FBJ murine osteosarcoma viral oncogene homolog (FOS), mRNA.	NM_005252.2	1305.9	311.4	1287.4	379.2	1215.4	317.8	3.79024	down
ILMN_1670490	PDPN	Homo sapiens podoplanin (PDPN), transcript variant 4, mRNA.	NM_001006625.1	1577.4	347.9	1544.9	353.1	1696.7	330.4	4.67037	down
ILMN_1670912	ACVR2A	Homo sapiens activin A receptor, type IIA (ACVR2A), mRNA.	NM_001616.3	268.4	99.3	227.3	123.6	244	101.8	2.28394	down
ILMN_1672350	JAM2	Homo sapiens junctional adhesion molecule 2 (JAM2), mRNA.	NM_021219.2	2289	670.1	2372	679.7	2209.3	695.8	3.35757	down
ILMN_1673409	MGC16121	PREDICTED: Homo sapiens hypothetical protein MGC16121 (MGC16121), mRNA.	XM_001128419.1	1523.3	673.8	1434.6	695.4	1546.2	719.9	2.15567	down
ILMN_1677198	C1R	Homo sapiens complement component 1, r subcomponent (C1R), mRNA.	NM_001733.4	3105.5	1039.1	3450.9	1020.4	3188.5	1056	3.12502	down
ILMN_1677603	C1S	Homo sapiens complement component 1, s subcomponent (C1S), transcript variant 2, mRNA.	NM_201442.1	696.1	293.3	746.7	295.3	703.6	291.6	2.4374	down
ILMN_1678215	RHOJ	Homo sapiens ras homolog gene family, member J (RHOJ), mRNA.	NM_020663.3	179.9	76	155.5	93.4	170.2	81.5	2.01899	down
ILMN_1678493	CHN1	Homo sapiens chimerin (chimaerin) 1 (CHN1), transcript variant 2, mRNA.	NM_001025201.1	4490.7	1875.7	4329.3	1870.7	4052.1	1792.9	2.32218	down
ILMN_1679694	MMP27	Homo sapiens matrix metallopeptidase 27 (MMP27), mRNA.	NM_022122.2	265.8	57.4	258.8	70.1	270.7	62.6	4.19696	down
ILMN_1680339	PDGFRL	Homo sapiens platelet-derived growth factor receptor-like (PDGFRL), mRNA.	NM_006207.1	960.6	397.3	953.9	369.9	1009.3	354	2.60988	down
ILMN_1681103	AQP1	Homo sapiens aquaporin 1 (Colton blood group) (AQP1), mRNA.	NM_198098.1	205.9	61.9	200.8	67.2	200.7	66.9	3.10094	down
ILMN_1681780	MKX	Homo sapiens mohawk homeobox (MKX), mRNA.	NM_173576.1	4573.2	2137.7	4337.2	2200.9	4287.2	2202.4	2.01707	down
ILMN_1682100	IGSF10	Homo sapiens immunoglobulin superfamily, member 10 (IGSF10), mRNA.	NM_178822.3	256.7	76.2	268.5	81	261	92.3	3.16075	down
ILMN_1682326	PCP4	Homo sapiens Purkinje cell protein 4 (PCP4), mRNA.	NM_006198.2	213.4	36	195	36.4	195.7	38.5	5.44484	down
ILMN_1682929	SYTL2	Homo sapiens synaptotagmin-like 2 (SYTL2), transcript variant d, mRNA.	NM_206928.1	1830.9	741.2	1811.5	711.4	1808.6	718.3	2.51129	down
ILMN_1683194	DCN	Homo sapiens decorin (DCN), transcript variant A1, mRNA.	NM_001920.3	3598.7	1009.6	3655.8	977.8	3719	951.6	3.73451	down
ILMN_1689088	COLEC12	Homo sapiens collectin sub-family member 12 (COLEC12), mRNA.	NM_130386.1	7085	1947.2	6376.9	1968.2	6604.2	1946.9	3.41965	down
ILMN_1689655	HLA-DRA	Homo sapiens major histocompatibility complex, class II, DR alpha (HLA-DRA), mRNA.	NM_019111.3	225.2	80.7	231.7	89.4	247	83.5	2.77608	down
ILMN_1690170	CRABP2	Homo sapiens cellular retinoic acid binding protein 2 (CRABP2), mRNA.	NM_001878.2	2059.4	903.8	1955.9	900.1	1849.9	873	2.1892	down
ILMN_1690703	C21orf34	Homo sapiens chromosome 21 open reading frame 34 (C21orf34), transcript variant 3, mRNA.	NM_001005734.1	311.1	130.3	307.9	129.5	311.5	139.1	2.33386	down
ILMN_1691860	SPRY1	Homo sapiens sprouty homolog 1, antagonist of FGF signaling (Drosophila) (SPRY1), transcript variant 2, mRNA.	NM_199327.1	458.6	120.7	466.6	119.8	458.7	108.8	3.96617	down
ILMN_1694011	WNT2	Homo sapiens wingless-type MMTV integration site family member 2 (WNT2), mRNA.	NM_003391.1	254.6	83.6	264	87.6	300.3	87.5	3.15815	down
ILMN_1695316	SLC39A8	Homo sapiens solute carrier family 39 (zinc transporter), member 8 (SLC39A8), mRNA.	NM_022154.5	515.6	179.2	517	176.1	523.1	207	2.774	down
ILMN_1695506	DKK2	Homo sapiens dickkopf homolog 2 (Xenopus laevis) (DKK2), mRNA.	NM_014421.2	1519.6	439	1685.7	447.4	1621.3	427.3	3.67136	down
ILMN_1697054	LRRN4CL	Homo sapiens LRRN4 C-terminal like (LRRN4CL), mRNA.	NM_203422.1	621.1	310.1	640.3	271.8	624.8	281.3	2.18838	down
ILMN_1697448	TXNIP	Homo sapiens thioredoxin interacting protein (TXNIP), mRNA.	NM_006472.2	1991.3	619.8	1833.3	559.2	1709.8	700.2	2.95183	down
ILMN_1698007	LOC651872	PREDICTED: Homo sapiens similar to C-C chemokine receptor type 11 (C-C CKR-11) (CC-CKR-11) (CCR-11) (CC chemokine receptor-like 1) (CCRL1) (CCX CKR) (LOC651872), mRNA.	XM_941135.2	3846.2	1258.1	4116.2	1166.8	4063.1	1180.9	3.33545	down
ILMN_1698144	CFH	Homo sapiens complement factor H (CFH), transcript variant 1, mRNA.	NM_000186.2	117.1	46.7	120	61.8	125	46	2.36517	down
ILMN_1704353	IGSF3	Homo sapiens immunoglobulin superfamily, member 3 (IGSF3), transcript variant 1, mRNA.	NM_001542.2	148.5	46.7	154.7	51.2	169.4	46.3	3.27583	down
ILMN_1704376	GLDN	Homo sapiens gliomedin (GLDN), mRNA.	NM_181789.2	316.4	105.7	341.4	112.3	351.5	114.3	3.03604	down
ILMN_1707529	ARG99	Homo sapiens ARG99 protein (ARG99), transcript variant 1, mRNA.	NM_031920.2	185.7	62.4	196.8	62.5	185.6	79.4	2.79797	down
ILMN_1708107	DPT	Homo sapiens dermatopontin (DPT), mRNA.	NM_001937.3	2614.7	272.6	2550.3	257	2554.1	280.7	9.53198	down
ILMN_1713499	WISP1	Homo sapiens WNT1 inducible signaling pathway protein 1 (WISP1), transcript variant 1, mRNA.	NM_003882.2	712.7	316.5	695.8	327.9	666.9	300.4	2.19725	down
ILMN_1713529	SEMA6A	Homo sapiens sema domain, transmembrane domain (TM), and cytoplasmic domain, (semaphorin) 6A (SEMA6A), mRNA.	NM_020796.3	176.1	61.7	153	64.9	181.4	63.7	2.67592	down
ILMN_1714523	HEPH	Homo sapiens hephaestin (HEPH), transcript variant 1, mRNA.	NM_138737.1	564.6	244.2	520.6	253.6	591.8	266.2	2.19334	down
ILMN_1715068	AQP9	Homo sapiens aquaporin 9 (AQP9), mRNA.	NM_020980.2	238.4	107.6	222.8	112.9	218.2	118.2	2.00594	down
ILMN_1716309	EGFL6	Homo sapiens EGF-like-domain, multiple 6 (EGFL6), mRNA.	NM_015507.2	137.3	49.5	124	51.8	158.2	50.3	2.7538	down
ILMN_1717727	LOC284293	PREDICTED: Homo sapiens similar to Placental thrombin inhibitor (Cytoplasmic antiproteinase) (CAP) (Protease inhibitor 6) (PI-6) (Serpin B6) (LOC284293), mRNA.	XM_209104.2	149	55.6	135.8	62.9	134.2	60.2	2.34516	down
ILMN_1719543	MAF	Homo sapiens v-maf musculoaponeurotic fibrosarcoma oncogene homolog (avian) (MAF), transcript variant 1, mRNA.	NM_005360.3	156	50.4	159.2	53.7	154.4	52.4	3.00142	down
ILMN_1719695	NFKBIZ	Homo sapiens nuclear factor of kappa light polypeptide gene enhancer in B-cells inhibitor, zeta (NFKBIZ), transcript variant 2, mRNA.	NM_001005474.1	1396.7	732.6	1450.1	694.8	1390.5	688.7	2.0028	down
ILMN_1719759	TNC	Homo sapiens tenascin C (TNC), mRNA.	NM_002160.2	15214.9	5377.4	15499.3	5610.7	14915.3	5838.6	2.71293	down
ILMN_1722898	SFRP2	Homo sapiens secreted frizzled-related protein 2 (SFRP2), mRNA.	NM_003013.2	2021.4	205.4	2192.2	207.6	2065.4	200.2	10.2349	down
ILMN_1725193	IGFBP2	Homo sapiens insulin-like growth factor binding protein 2, 36kDa (IGFBP2), mRNA.	NM_000597.2	513.4	88.8	534.6	99.5	548.7	85.1	5.85084	down
ILMN_1726448	MMP1	Homo sapiens matrix metallopeptidase 1 (interstitial collagenase) (MMP1), mRNA.	NM_002421.2	11343.5	6005	12890.7	6070.8	12376.9	6012.2	2.02122	down
ILMN_1726711	PENK	Homo sapiens proenkephalin (PENK), mRNA.	NM_006211.2	217.2	90.5	230.8	87.2	234	91.1	2.53635	down
ILMN_1730794	SERTAD4	Homo sapiens SERTA domain containing 4 (SERTAD4), mRNA.	NM_019605.2	928.6	385	828.4	369.5	894.3	359.6	2.37804	down
ILMN_1731206	NKD2	Homo sapiens naked cuticle homolog 2 (Drosophila) (NKD2), mRNA.	NM_033120.2	108.7	40.2	106.6	42.7	119.6	37.5	2.78192	down
ILMN_1733658	C1orf99	Homo sapiens chromosome 1 open reading frame 99 (C1orf99), mRNA.	NM_001012274.1	362.5	115.5	353.7	114.7	313.2	111.1	3.01048	down
ILMN_1735764	HTR2B	Homo sapiens 5-hydroxytryptamine (serotonin) receptor 2B (HTR2B), mRNA.	NM_000867.3	1078.9	492.5	1149	492.6	1191.2	477.8	2.3355	down
ILMN_1735996	NOX4	Homo sapiens NADPH oxidase 4 (NOX4), mRNA.	NM_016931.2	493.5	205.5	423.5	214	448	228.3	2.10489	down
ILMN_1736078	THBS4	Homo sapiens thrombospondin 4 (THBS4), mRNA.	NM_003248.3	1056	74.1	1047.4	77.2	1082.2	75.7	14.0341	down
ILMN_1736184	GSTM3	Homo sapiens glutathione S-transferase M3 (brain) (GSTM3), mRNA.	NM_000849.3	225.2	107.6	228.3	116.3	225.8	113.3	2.01554	down
ILMN_1736940	HPRT1	Homo sapiens hypoxanthine phosphoribosyltransferase 1 (Lesch-Nyhan syndrome) (HPRT1), mRNA.	NM_000194.1	879.9	172.5	920.9	177	850.5	181.8	4.98871	down
ILMN_1737650	DIO2	Homo sapiens deiodinase, iodothyronine, type II (DIO2), transcript variant 3, mRNA.	NM_001007023.2	1024.5	227.6	878.4	222.7	885.6	217.9	4.16323	down
ILMN_1738552	SLC1A3	Homo sapiens solute carrier family 1 (glial high affinity glutamate transporter), member 3 (SLC1A3), mRNA.	NM_004172.3	949.8	447.3	979.6	399.7	1040.1	393.1	2.39684	down
ILMN_1739154	LSAMP	Homo sapiens limbic system-associated membrane protein (LSAMP), mRNA.	NM_002338.2	393.9	179.1	403.8	177	401.8	184.3	2.21985	down
ILMN_1742788	PKD1L2	Homo sapiens polycystic kidney disease 1-like 2 (PKD1L2), transcript variant 1, mRNA.	NM_052892.3	117.8	45.4	137.5	47.7	120.6	44	2.73688	down
ILMN_1746673	2009-09-03	Homo sapiens septin 3 (SEPT3), transcript variant B, mRNA.	NM_019106.4	140	68	137.9	69.5	131.5	66.1	2.01052	down
ILMN_1750062	PPARGC1A	Homo sapiens peroxisome proliferator-activated receptor gamma, coactivator 1 alpha (PPARGC1A), mRNA.	NM_013261.3	237.7	118.8	283.8	127.3	246.4	136.9	2.00237	down
ILMN_1751607	FOSB	Homo sapiens FBJ murine osteosarcoma viral oncogene homolog B (FOSB), mRNA.	NM_006732.1	659.4	141.8	672.4	153.6	711.6	148.5	4.60334	down
ILMN_1752592	HLA-DRB4	Homo sapiens major histocompatibility complex, class II, DR beta 4 (HLA-DRB4), mRNA.	NM_021983.4	149	69.2	168.7	69.4	153.7	63.5	2.33119	down
ILMN_1752935	TMEM30B	Homo sapiens transmembrane protein 30B (TMEM30B), mRNA.	NM_001017970.2	104.5	55.5	116.2	48.4	112.8	53.6	2.1189	down
ILMN_1755215	SAMD5	Homo sapiens sterile alpha motif domain containing 5 (SAMD5), mRNA.	NM_001030060.1	293.4	98	254.1	96.7	252.8	88	2.82728	down
ILMN_1758705	IRX6	Homo sapiens iroquois homeobox 6 (IRX6), mRNA.	NM_024335.2	125.5	52.7	138.7	50.7	129.1	54.9	2.48362	down
ILMN_1762861	HLA-F	Homo sapiens major histocompatibility complex, class I, F (HLA-F), transcript variant 1, mRNA.	NM_001098479.1	190.8	85.3	198.3	103.6	190.4	88	2.10019	down
ILMN_1763457	SGCD	Homo sapiens sarcoglycan, delta (35kDa dystrophin-associated glycoprotein) (SGCD), transcript variant 1, mRNA.	NM_000337.4	2771.9	1060.4	2530.1	1012.3	2686	1152.4	2.47864	down
ILMN_1764109	C1R	Homo sapiens complement component 1, r subcomponent (C1R), mRNA.	NM_001733.4	2538.2	749.5	2660.2	755	2599.7	707.3	3.52653	down
ILMN_1764309	ADH1A	Homo sapiens alcohol dehydrogenase 1A (class I), alpha polypeptide (ADH1A), mRNA.	NM_000667.2	1176.8	291	1236.6	300.5	1206.9	311	4.01207	down
ILMN_1765574	TFAP2A	Homo sapiens transcription factor AP-2 alpha (activating enhancer binding protein 2 alpha) (TFAP2A), transcript variant 3, mRNA.	NM_001042425.1	529.1	235.2	488	239.6	527	247	2.1382	down
ILMN_1766914	MFAP4	Homo sapiens microfibrillar-associated protein 4 (MFAP4), mRNA.	NM_002404.1	9427.5	2795.3	9303.8	2736.4	9971.2	2692.8	3.4887	down
ILMN_1767523	IL17RB	Homo sapiens interleukin 17 receptor B (IL17RB), mRNA.	NM_018725.3	393.9	111.9	384.7	109.8	392.4	106.8	3.56515	down
ILMN_1768227	DCN	Homo sapiens decorin (DCN), transcript variant A2, mRNA.	NM_133503.2	11040.7	3162.3	10411.7	3168	10677.7	3784.3	3.18718	down
ILMN_1768753	LOC653342	PREDICTED: Homo sapiens similar to Complement C1r subcomponent precursor (Complement component 1, r subcomponent) (LOC653342), mRNA.	XM_926986.1	229.3	89.8	211.6	94.8	250.5	94	2.4765	down
ILMN_1768940	COL15A1	Homo sapiens collagen, type XV, alpha 1 (COL15A1), mRNA.	NM_001855.3	315.9	77.7	326.6	92.4	342.1	92.5	3.75977	down
ILMN_1773992	CCRL1	Homo sapiens chemokine (C-C motif) receptor-like 1 (CCRL1), transcript variant 2, mRNA.	NM_016557.2	3482.8	1211.5	3585.5	1068.4	3542.6	1045.5	3.19747	down
ILMN_1775235	AFF3	Homo sapiens AF4/FMR2 family, member 3 (AFF3), transcript variant 2, mRNA.	NM_001025108.1	1432.6	571.6	1311.6	576.6	1451.5	571.1	2.43793	down
ILMN_1777190	CFD	Homo sapiens complement factor D (adipsin) (CFD), mRNA.	NM_001928.2	1079.5	264.7	1106	241.4	1151.5	259.3	4.36163	down
ILMN_1777263	MEOX2	Homo sapiens mesenchyme homeobox 2 (MEOX2), mRNA.	NM_005924.4	385.6	120.7	380.3	140.9	420.3	135.4	2.99131	down
ILMN_1778401	HLA-B	Homo sapiens major histocompatibility complex, class I, B (HLA-B), mRNA.	NM_005514.5	3642.2	1442.6	3613.1	1395.3	3624.4	1342	2.60398	down
ILMN_1779144	CLEC2A	Homo sapiens C-type lectin domain family 2, member A (CLEC2A), mRNA.	NM_207375.1	378.2	180.8	398.8	171.2	379.7	165.3	2.2369	down
ILMN_1780170	APOD	Homo sapiens apolipoprotein D (APOD), mRNA.	NM_001647.2	1261	257.7	1276.7	234.7	1365.9	251.4	5.249	down
ILMN_1781121	TWISTNB	Homo sapiens TWIST neighbor (TWISTNB), mRNA.	NM_001002926.1	881	418.5	845.1	396.3	868.8	419	2.10357	down
ILMN_1781149	INMT	Homo sapiens indolethylamine N-methyltransferase (INMT), mRNA.	NM_006774.4	535.9	175	547.5	160.9	570.6	156.1	3.36461	down
ILMN_1781626	C1S	Homo sapiens complement component 1, s subcomponent (C1S), transcript variant 1, mRNA.	NM_001734.2	5068.3	2317.4	4659.2	2286.3	5143.4	2222.7	2.17672	down
ILMN_1781769	CCRL1	Homo sapiens chemokine (C-C motif) receptor-like 1 (CCRL1), transcript variant 2, mRNA.	NM_016557.2	469.3	150.4	474.4	148.8	446.6	141.2	3.15701	down
ILMN_1784176	ABCA5	Homo sapiens ATP-binding cassette, sub-family A (ABC1), member 5 (ABCA5), transcript variant 1, mRNA.	NM_018672.2	277.4	142.2	297.6	138.2	322.3	150.9	2.07795	down
ILMN_1785732	TNFAIP6	Homo sapiens tumor necrosis factor, alpha-induced protein 6 (TNFAIP6), mRNA.	NM_007115.2	1064.9	286.9	1077.2	258	1071.1	267.7	3.95803	down
ILMN_1787186	NOV	Homo sapiens nephroblastoma overexpressed gene (NOV), mRNA.	NM_002514.2	4798.4	2115.4	4781.8	2176.1	4477.8	2234	2.15377	down
ILMN_1789639	FMOD	Homo sapiens fibromodulin (FMOD), mRNA.	NM_002023.3	664	141.2	601.2	147.3	637	148	4.35521	down
ILMN_1789999	SLC30A7	Homo sapiens solute carrier family 30 (zinc transporter), member 7 (SLC30A7), mRNA.	NM_133496.3	1892.6	727.9	2058.9	700.3	1978.1	744.5	2.7284	down
ILMN_1790160	KIT	Homo sapiens v-kit Hardy-Zuckerman 4 feline sarcoma viral oncogene homolog (KIT), transcript variant 2, mRNA.	NM_001093772.1	2789.7	865.5	2696.2	851.2	2888.1	863.9	3.24379	down
ILMN_1790881	HNMT	Homo sapiens histamine N-methyltransferase (HNMT), transcript variant 2, mRNA.	NM_001024074.1	1416.9	654.1	1287.3	707.1	1412.7	652.5	2.04388	down
ILMN_1791890	SPON1	Homo sapiens spondin 1, extracellular matrix protein (SPON1), mRNA.	NM_006108.2	1956.4	166.7	1880.4	198.6	1853.8	205.7	10.0048	down
ILMN_1795754	CLIC2	Homo sapiens chloride intracellular channel 2 (CLIC2), mRNA.	NM_001289.4	270.6	117	258.2	129.9	265.7	114.6	2.20072	down
ILMN_1796772	ARHGAP28	Homo sapiens Rho GTPase activating protein 28 (ARHGAP28), transcript variant 1, mRNA.	NM_001010000.1	158.5	67.2	170	73.2	189.1	80.5	2.34332	down
ILMN_1796801	ABCA8	Homo sapiens ATP-binding cassette, sub-family A (ABC1), member 8 (ABCA8), mRNA.	NM_007168.2	208.1	100.5	212.3	92.4	246.7	90.9	2.34601	down
ILMN_1797926	ROBO2	Homo sapiens roundabout, axon guidance receptor, homolog 2 (Drosophila) (ROBO2), mRNA.	NM_002942.1	467.1	82.3	454.4	70.8	524.5	76.7	6.292	down
ILMN_1798360	CXCR7	Homo sapiens chemokine (C-X-C motif) receptor 7 (CXCR7), mRNA.	NM_020311.2	6519.9	3419.5	6647.6	3350.4	6521.6	3032	2.01136	down
ILMN_1798886	NUDT21	Homo sapiens nudix (nucleoside diphosphate linked moiety X)-type motif 21 (NUDT21), mRNA.	NM_007006.2	1079.8	516.5	1133.7	554.2	1019.7	497.9	2.06132	down
ILMN_1801441	RFTN2	Homo sapiens raftlin family member 2 (RFTN2), mRNA.	NM_144629.1	642.3	230.3	715.2	245.5	662.2	261.2	2.74123	down
ILMN_1801842	PTX3	Homo sapiens pentraxin-related gene, rapidly induced by IL-1 beta (PTX3), mRNA.	NM_002852.2	2694	1171.4	2797.7	1047.9	2734.3	1069	2.50427	down
ILMN_1802411	ITGA1	Homo sapiens integrin, alpha 1 (ITGA1), mRNA.	NM_181501.1	1043	519.3	1084.5	492.4	1021.2	451.9	2.15418	down
ILMN_1803094	PDGFD	Homo sapiens platelet derived growth factor D (PDGFD), transcript variant 2, mRNA.	NM_033135.3	1646.4	542.2	1673.4	530.7	1641.3	514.3	3.12631	down
ILMN_1804396	C14orf4	Homo sapiens chromosome 14 open reading frame 4 (C14orf4), mRNA.	NM_024496.2	1964	829.8	2046.6	838	1983.6	787.7	2.44165	down
ILMN_1805645	TMTC2	Homo sapiens transmembrane and tetratricopeptide repeat containing 2 (TMTC2), mRNA.	NM_152588.1	241.3	110.1	251.5	120	289.6	118.5	2.23908	down
ILMN_1805665	FLRT3	Homo sapiens fibronectin leucine rich transmembrane protein 3 (FLRT3), transcript variant 2, mRNA.	NM_198391.1	413.6	123.5	432.5	120.7	401.3	132.9	3.30912	down
ILMN_1808590	GUCY1A3	Homo sapiens guanylate cyclase 1, soluble, alpha 3 (GUCY1A3), mRNA.	NM_000856.3	106.6	49.2	114.6	46.9	112.3	53.4	2.23296	down
ILMN_1808650	CYP39A1	Homo sapiens cytochrome P450, family 39, subfamily A, polypeptide 1 (CYP39A1), mRNA.	NM_016593.3	116.2	49.9	86.1	42.7	98.7	47.4	2.13832	down
ILMN_1809490	NAP5	Homo sapiens Nck-associated protein 5 (NAP5), transcript variant 1, mRNA.	NM_207363.2	150.4	71.1	169.6	67.6	154.4	75	2.21895	down
ILMN_1810910	CFH	Homo sapiens complement factor H (CFH), transcript variant 2, mRNA.	NM_001014975.1	457.5	152	483.5	157.4	492.8	158.8	3.0614	down
ILMN_1811426	TMTC1	Homo sapiens transmembrane and tetratricopeptide repeat containing 1 (TMTC1), mRNA.	NM_175861.2	1895.3	559.3	1926.1	666.2	1844.5	633.2	3.05597	down
ILMN_1811598	ADH1B	Homo sapiens alcohol dehydrogenase IB (class I), beta polypeptide (ADH1B), mRNA.	NM_000668.3	166.7	59	151.2	61.2	166.2	64	2.62691	down
ILMN_1812461	WISP2	Homo sapiens WNT1 inducible signaling pathway protein 2 (WISP2), mRNA.	NM_003881.2	2964.8	1038.7	3097	1012.3	3131.2	1004.2	3.00845	down
ILMN_1812841	C8orf34	Homo sapiens chromosome 8 open reading frame 34 (C8orf34), mRNA.	NM_052958.1	695.3	269.6	665.6	240.8	654	266.4	2.59628	down
ILMN_1815895	LOC649143	PREDICTED: Homo sapiens similar to HLA class II histocompatibility antigen, DRB1-9 beta chain precursor (MHC class I antigen DRB1*9) (DR-9) (DR9), transcript variant 2 (LOC649143), mRNA.	XM_944822.1	93.1	53.3	99.7	47.8	97.3	44	2.0047	down
ILMN_1852343		Homo sapiens cDNA FLJ33551 fis, clone BRAMY2009105	AK090870	148.7	71.6	147	67.5	151.1	70.7	2.13019	down
ILMN_1866954		Homo sapiens mRNA full length insert cDNA clone EUROIMAGE 994183	AJ420536	339.6	179.8	361	177.6	381.1	182.1	2.00289	down
ILMN_1873621	NTN1	Homo sapiens netrin 1 (NTN1), mRNA.	NM_004822.2	1162.1	168	1175.4	172.2	1172.6	178.4	6.77039	down
ILMN_1881313		K-EST0172083 L12JSHC0 Homo sapiens cDNA clone L12JSHC0-2-D12 5, mRNA sequence	CB123670	980.4	538.3	1014.6	480.3	1035	496.7	2.00141	down
ILMN_1887987		Homo sapiens cDNA FLJ31059 fis, clone HSYRA2000832	AK055621	411.4	217.2	446.3	227.4	466.6	184.4	2.11094	down
ILMN_1907728		Homo sapiens cDNA clone IMAGE:5284125	BC041405	102	51.5	103.4	50	100.2	48.2	2.042	down
ILMN_2042792	C13orf16	Homo sapiens chromosome 13 open reading frame 16 (C13orf16), mRNA.	NM_152324.1	148.7	65.1	139.8	66	145.5	68.9	2.16993	down
ILMN_2052135	LOH3CR2A	Homo sapiens loss of heterozygosity, 3, chromosomal region 2, gene A (LOH3CR2A), mRNA.	NM_013343.1	348.6	136.8	309	146.7	326	138.3	2.33017	down
ILMN_2053103	SLC40A1	Homo sapiens solute carrier family 40 (iron-regulated transporter), member 1 (SLC40A1), mRNA.	NM_014585.3	727.2	330.6	775.7	313.4	706.3	330.7	2.26551	down
ILMN_2054297	PTGS2	Homo sapiens prostaglandin-endoperoxide synthase 2 (prostaglandin G/H synthase and cyclooxygenase) (PTGS2), mRNA.	NM_000963.1	870.5	442.4	882.7	435.2	875.2	400.5	2.05839	down
ILMN_2056975	HPRT1	Homo sapiens hypoxanthine phosphoribosyltransferase 1 (Lesch-Nyhan syndrome) (HPRT1), mRNA.	NM_000194.1	2073.5	283.7	1968.2	334.4	1987.1	297.8	6.59651	down
ILMN_2057479	EGFL6	Homo sapiens EGF-like-domain, multiple 6 (EGFL6), mRNA.	NM_015507.2	419.4	40.1	393	47.3	401.4	52.2	8.7426	down
ILMN_2107613	RHOJ	Homo sapiens ras homolog gene family, member J (RHOJ), mRNA.	NM_020663.2	172.4	68.4	169.4	83.6	183.9	82.8	2.24688	down
ILMN_2112638	SVEP1	Homo sapiens sushi, von Willebrand factor type A, EGF and pentraxin domain containing 1 (SVEP1), mRNA.	NM_153366.2	7738.3	2914.5	7825.3	2953.9	7874.9	2841.5	2.6913	down
ILMN_2120210	RCAN2	Homo sapiens regulator of calcineurin 2 (RCAN2), mRNA.	NM_005822.2	7206.5	2115.6	7002.5	2066.5	7487.1	1997.1	3.51081	down
ILMN_2135272	GIMAP2	Homo sapiens GTPase, IMAP family member 2 (GIMAP2), mRNA.	NM_015660.2	166.2	81.2	158.6	81.2	170.7	82.8	2.01996	down
ILMN_2141482	SERPINF1	Homo sapiens serpin peptidase inhibitor, clade F (alpha-2 antiplasmin, pigment epithelium derived factor), member 1 (SERPINF1), mRNA.	NM_002615.4	2292.9	756.1	2252.7	823.5	2125.7	732.5	2.88744	down
ILMN_2148944	ADCY4	Homo sapiens adenylate cyclase 4 (ADCY4), mRNA.	NM_139247.2	190.4	72.8	194	74.4	192.3	71.3	2.63968	down
ILMN_2150851	SERPINB2	Homo sapiens serpin peptidase inhibitor, clade B (ovalbumin), member 2 (SERPINB2), mRNA.	NM_002575.1	753.5	319	806.2	320.7	734.8	325	2.3767	down
ILMN_2150856	SERPINB2	Homo sapiens serpin peptidase inhibitor, clade B (ovalbumin), member 2 (SERPINB2), mRNA.	NM_002575.1	1173.4	474.1	1241.4	529	1308.2	476.3	2.51734	down
ILMN_2152711	ACVR2A	Homo sapiens activin A receptor, type IIA (ACVR2A), mRNA.	NM_001616.3	1341.1	555.8	1322.2	553.6	1451.6	571.9	2.44563	down
ILMN_2157441	HLA-DRA	Homo sapiens major histocompatibility complex, class II, DR alpha (HLA-DRA), mRNA.	NM_019111.3	271.9	88.5	271.4	82.6	276.6	91.4	3.12608	down
ILMN_2160428	IL1RAPL1	Homo sapiens interleukin 1 receptor accessory protein-like 1 (IL1RAPL1), mRNA.	NM_014271.2	100.9	44.9	89.3	48.4	102.7	44.8	2.11827	down
ILMN_2165753	HLA-A29.1	Homo sapiens major histocompatibility complex class I HLA-A29.1 (HLA-A29.1), mRNA. XM_001132736 XM_001132742 XM_001132747 XM_001132750 XM_001132753 XM_001132757 XM_001132760 XM_001132769 XM_001132772 XM_001132776 XM_001132779 XM_001132781 XM_001132783 XM_001132785 XM_001132794	NM_001080840.1	987	500.7	1014	523.7	988.7	460.5	2.01609	down
ILMN_2176592	BCHE	Homo sapiens butyrylcholinesterase (BCHE), mRNA.	NM_000055.1	107	40.3	107.1	50.8	112.8	50	2.3287	down
ILMN_2189306	ROBO2	Homo sapiens roundabout, axon guidance receptor, homolog 2 (Drosophila) (ROBO2), mRNA.	NM_002942.2	246.3	53	277.6	68.2	275	58.8	4.45581	down
ILMN_2194688	DKK2	Homo sapiens dickkopf homolog 2 (Xenopus laevis) (DKK2), mRNA.	NM_014421.2	3169.7	993.7	3117.3	939.4	3349.9	1105.1	3.17766	down
ILMN_2205963	C10orf54	Homo sapiens chromosome 10 open reading frame 54 (C10orf54), mRNA.	NM_022153.1	963.2	483.4	1051.2	449.8	957.1	493.7	2.0822	down
ILMN_2229379	KIT	Homo sapiens v-kit Hardy-Zuckerman 4 feline sarcoma viral oncogene homolog (KIT), mRNA.	NM_000222.1	4234.3	1273.3	4410	1339.2	4535.8	1341.4	3.33309	down
ILMN_2233539	SLC39A8	Homo sapiens solute carrier family 39 (zinc transporter), member 8 (SLC39A8), mRNA.	NM_022154.5	310.6	118.4	309.2	121	291.2	112.7	2.58736	down
ILMN_2284744	HNMT	Homo sapiens histamine N-methyltransferase (HNMT), transcript variant 1, mRNA.	NM_006895.2	727.2	353.6	720.3	345.9	752.5	353.4	2.08921	down
ILMN_2290204	ARHGAP28	Homo sapiens Rho GTPase activating protein 28 (ARHGAP28), transcript variant 1, mRNA.	NM_001010000.1	208.8	90.6	175.7	85.3	217	88.8	2.26373	down
ILMN_2292178	CLEC12A	Homo sapiens C-type lectin domain family 12, member A (CLEC12A), transcript variant 1, mRNA.	NM_138337.4	388.7	143.3	398.5	139.9	379.9	151.5	2.68583	down
ILMN_2329914	SPRY1	Homo sapiens sprouty homolog 1, antagonist of FGF signaling (Drosophila) (SPRY1), transcript variant 1, mRNA.	NM_005841.1	1056.4	213.2	1146.6	206.6	1137.4	197.7	5.40849	down
ILMN_2331922	CCRL1	Homo sapiens chemokine (C-C motif) receptor-like 1 (CCRL1), transcript variant 1, mRNA.	NM_178445.1	495.7	186	505.5	191.5	554.5	206.2	2.66455	down
ILMN_2334385	NAP5	Homo sapiens Nck-associated protein 5 (NAP5), transcript variant 1, mRNA.	NM_207363.2	119.7	51.6	114.3	61.5	122.3	61	2.05228	down
ILMN_2336609	SYTL2	Homo sapiens synaptotagmin-like 2 (SYTL2), transcript variant e, mRNA.	NM_206929.1	4861.9	1781.8	4069.8	1915.2	4819.1	1807	2.49137	down
ILMN_2376859	PDGFD	Homo sapiens platelet derived growth factor D (PDGFD), transcript variant 1, mRNA.	NM_025208.4	1040	306	1012.2	316.3	979.7	288.9	3.3287	down
ILMN_2411864	PHACTR3	Homo sapiens phosphatase and actin regulator 3 (PHACTR3), transcript variant 3, mRNA.	NM_183246.1	149.7	66.1	161.1	68.8	136.1	74.2	2.13465	down
ILMN_2412192	CFH	Homo sapiens complement factor H (CFH), transcript variant 2, mRNA.	NM_001014975.1	551	199.5	567.8	212.5	552.8	243.5	2.55881	down
ILMN_2412336	AKR1C2	Homo sapiens aldo-keto reductase family 1, member C2 (dihydrodiol dehydrogenase 2; bile acid binding protein; 3-alpha hydroxysteroid dehydrogenase, type III) (AKR1C2), transcript variant 1, mRNA. XM_943424 XM_943425 XM_943427	NM_001354.4	4621.1	1874.6	4649.7	1920.6	4917.2	2029.7	2.43615	down
Conc. = Control human fibroblast
KD = HPRT knockdowned human fibroblast
